# Supplementary material for: Scaling up primary health services for improving reproductive, maternal, and child health: a multisectoral collaboration in the conflict setting of Afghanistan
Source: PubMed Central journal article supplement — BMJ. 2018 Dec 7;363:k4986. doi: 10.1136/bmj.k4986 (PMC6282736; doi:10.1136/bmj.k4986), 2018-12-07
Supplement: dasj047936.ww1.pdf [file dasj047936.ww1.pdf]

# Scaling up primary health services for improving reproductive, maternal and child health: a multi-sectoral collaboration in the conflict setting of Afghanistan

Supplement 1 Sections:

1. Background and context
2. Methodology
3. List of BPHS interventions
4. Governance and coordination mechanisms
5. Community-based approaches in BPHS
6. National health priority indicators
7. Funding mechanisms
8. Innovations
9. SWOT analysis

## Section 1. Background and context

Table S1: Major health indicators of Afghanistan in 2002

| Priority indicator                                                                                   | Value |
|------------------------------------------------------------------------------------------------------|-------|
| Life expectancy at birth (years)                                                                     | 44.5  |
| Infant mortality rate per 1000 live births                                                           | 115   |
| Maternal mortality ratio per 100,000 live births                                                     | 1600  |
| Total fertility rate                                                                                 | 6.23  |
| Deliveries attended by trained personnel (%)                                                         | 14.3  |
| Married women (15-49) using contraceptives (%)                                                       | 10.3  |
| Infants fully immunized (measles) (%)                                                                | 50    |
| Pregnant women attended by trained personnel (%)                                                     | 16.1  |
| Population with access to safe drinking water (%)                                                    | 40.2  |
| Active BPHS health facilities registered (2004)                                                      | 1075  |
| Active female Community Health Workers (2004)                                                        | 729   |
| Midwives per 10,000 population                                                                       | 0.08  |
| Source: Afghanistan Health Indicators <sup>1</sup> ; UNFPA 2003 <sup>2</sup> ; Afghanistan HIMS data |       |

## Section 2. Methodology

### Systematic Literature Review

For the review, a search strategy was developed and articles were searched on EMBASE, Medline, Scopus, CINAHL, PubMed and Google Scholar to identify the relevant studies (below). Grey literature was also searched on the internet using Google and other relevant databases. All study designs including opinion pieces, editorials, conference abstracts, single

case studies, advocacy materials and letters relevant to the topic were included. All the searched articles were imported to EndNote and double screened by two individuals; conflicts were resolved by mutual consensus. All the articles were screened based on title and abstract followed by full text screening. The search flow diagram is included below.

Data extraction for each record was carried out in an excel sheet by two team members individually. A report was formulated from the extracted data from grey, peer reviewed literature and surveys of Afghanistan (such as demographic health surveys, national nutrition survey and multiple indicator cluster survey). Using the extracted data, various themes and results were generated which assisted in report formulation.

*Search Strategy:*

PubMed and Google Scholar:

Afghan\* AND "BPHS" OR "Basic Package of Health Services"

EMBASE& MEDLINE:

| #  | Searches                                         |
|----|--------------------------------------------------|
| 1  | health services/                                 |
| 2  | ("basic package of health services" or BPHS).mp. |
| 3  | exp AFGHANISTAN/                                 |
| 4  | Afghan*.mp.                                      |
| 5  | "Health service*".mp.                            |
| 6  | 1 or 2 or 5                                      |
| 7  | 3 or 4                                           |
| 8  | 6 and 7                                          |
| 9  | limit 8 to english language                      |
| 10 | limit 9 to yr="2001 -Current"                    |

SCOPUS:

((TITLE-ABS-KEY ("Basic package of health services" OR "BPHS") OR TITLE-ABS-KEY ("Health services/")) OR TITLE-ABS-KEY ("health service\*" .mp.)) AND TITLE-ABS-KEY (afghanistan/ OR afghan\*.mp.)) AND ( LIMIT-TO ( LANGUAGE , "English" ) ) AND ( LIMIT-TO ( PUBYEAR , 2018 ) OR LIMIT-TO ( PUBYEAR , 2017 ) OR LIMIT-TO ( PUBYEAR , 2016 ) OR LIMIT-TO ( PUBYEAR , 2015 ) OR LIMIT-TO ( PUBYEAR , 2014 ) OR LIMIT-TO ( PUBYEAR , 2013 ) OR LIMIT-TO ( PUBYEAR , 2012 ) OR LIMIT-TO ( PUBYEAR , 2011 ) OR LIMIT-TO ( PUBYEAR , 2010 ) OR LIMIT-TO ( PUBYEAR , 2009 ) OR LIMIT-TO ( PUBYEAR , 2008 ) OR LIMIT-TO ( PUBYEAR , 2007 ) OR LIMIT-TO ( PUBYEAR , 2006 ) OR LIMIT-TO ( PUBYEAR , 2005 ) OR LIMIT-TO ( PUBYEAR , 2004 ) OR LIMIT-

TO ( PUBYEAR , 2003 ) OR LIMIT-TO ( PUBYEAR , 2002 ) OR LIMIT-TO ( PUBYEAR , 2001 ) )

**CINAHL (EBSCO):**

(MH Health Services OR TX ("Basic package of health services" OR BPHS)) OR TX "health service\*") AND ((MH afghanistan or TX Afghan\*))

*Search Flow Diagram:*

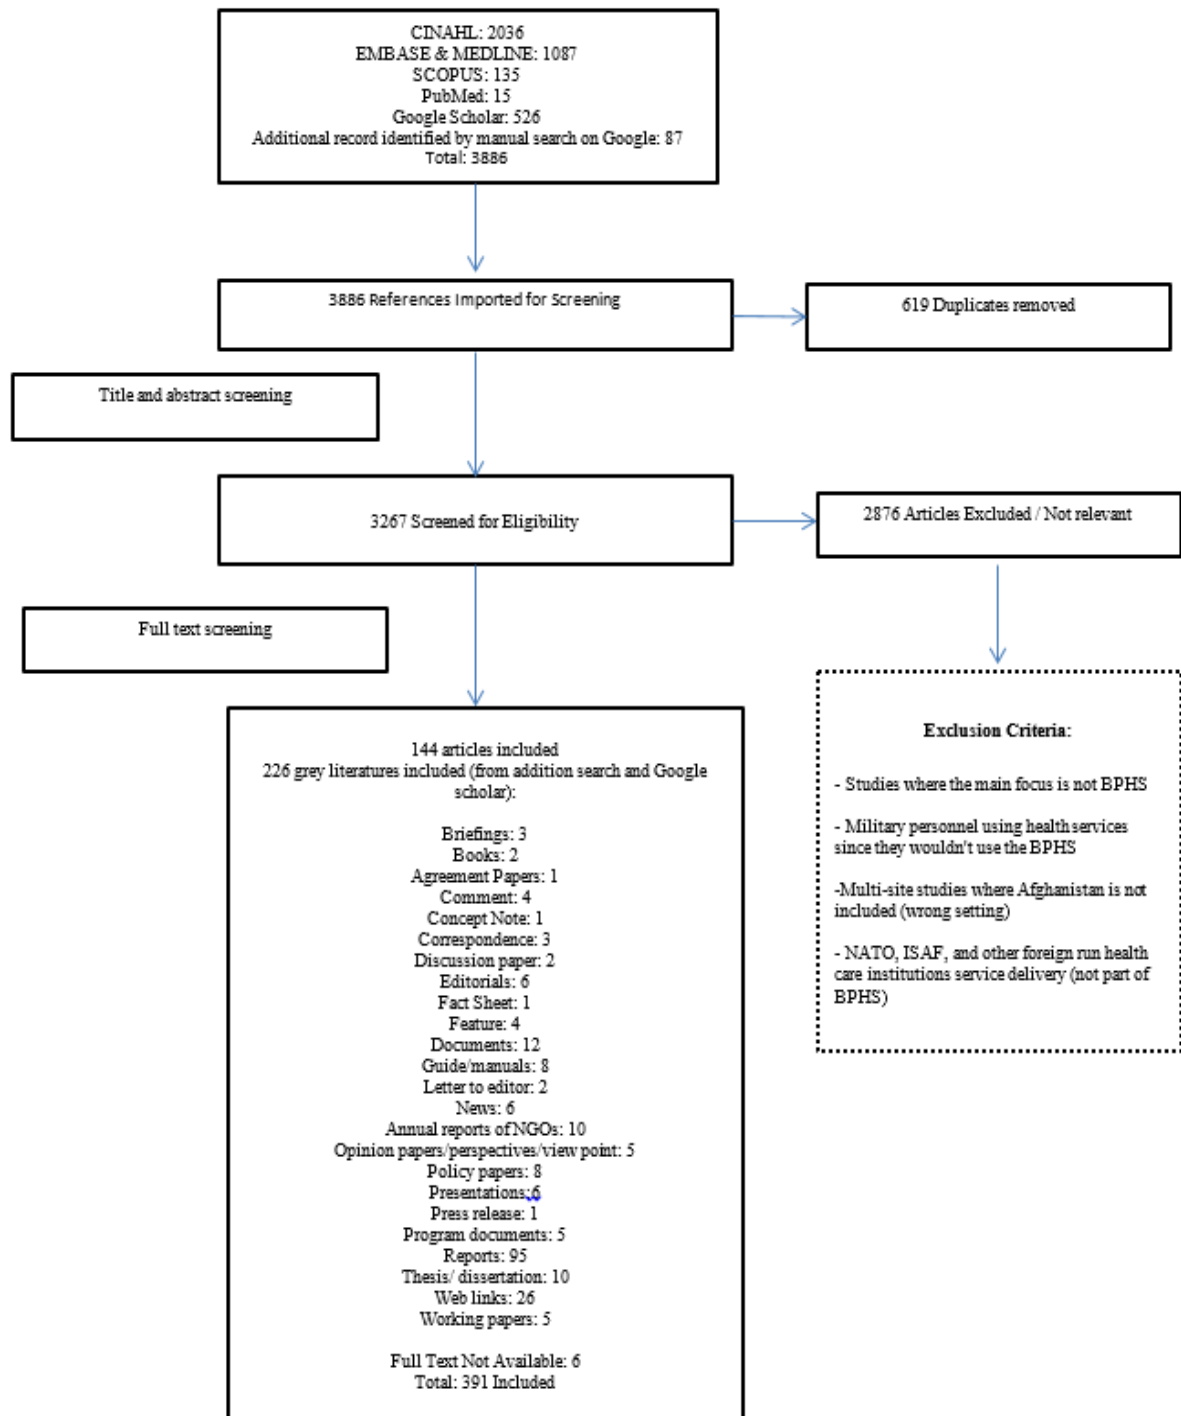

Country Working Group:

Table S2: Country working group

| S.N                                          | Government                                   |                                                                               |
|----------------------------------------------|----------------------------------------------|-------------------------------------------------------------------------------|
| 1                                            | Government of Afghanistan                    | Deputy Minister of Public Health for Policy and Planning, Dr. Ahmad Jan Naeem |
| 2                                            |                                              | Dr. Khwaja Mir Islam Saeed                                                    |
| 3                                            |                                              | Dr. Attaullah Sayedzai, Bahara Rasooly and Muzhgan Habibi                     |
| <b>iNGOs</b>                                 |                                              |                                                                               |
| 4                                            | Swedish Committee for Afghanistan            | Dr. Aziz Baig                                                                 |
| <b>Local NGOs</b>                            |                                              |                                                                               |
| 5                                            | AHDS                                         | Dr. Mohammad Fareed Asmand                                                    |
| 6                                            | SHDP                                         | Dr. Khalil Mohmand                                                            |
| 7                                            | CAF                                          | Dr. Nasir Hamid                                                               |
| <b>Hospital</b>                              |                                              |                                                                               |
| 8                                            | French Medical Institute for Children (FMIC) | Dr. Abdullah Fahim                                                            |
| <b>Inter-governmental Organization (IGO)</b> |                                              |                                                                               |
| 9                                            | World Bank                                   | Habibullah Ahmadzai                                                           |
| <b>UN Agencies</b>                           |                                              |                                                                               |
| 10                                           | UNDP                                         | Dr. Alim Atarud                                                               |

**Section 3. List of BPHS Interventions**

Table S3: List of BPHS interventions

| Domain                 | Interventions                                                                                                                                                                                              |
|------------------------|------------------------------------------------------------------------------------------------------------------------------------------------------------------------------------------------------------|
| Antenatal Care         | Antenatal visits—weight, height measurement                                                                                                                                                                |
|                        | Information, education, and communication (IEC)                                                                                                                                                            |
|                        | Pregnancy diagnosis                                                                                                                                                                                        |
|                        | Blood pressure measurement                                                                                                                                                                                 |
|                        | Tetanus immunization                                                                                                                                                                                       |
|                        | Iron and folic acid supplementation to pregnant women                                                                                                                                                      |
|                        | Multi nutrient supplementation                                                                                                                                                                             |
|                        | Screening and management of sexually transmitted disease                                                                                                                                                   |
|                        | Treatment of anemia, asymptomatic urinary tract infections, intestinal worms, pre-eclampsia/eclampsia, hypertensive disorders of pregnancy, incomplete miscarriage/abortion, ectopic pregnancy and malaria |
|                        | Safe injection practices, infection control and proper waste disposal                                                                                                                                      |
| Delivery Care Services | Assist normal and vaginal deliveries                                                                                                                                                                       |
|                        | Information, education, and communication (IEC)                                                                                                                                                            |
|                        | Labor monitoring                                                                                                                                                                                           |
|                        | Prenatal administration of oxytocin, anticonvulsants, internal fluids and antibiotics                                                                                                                      |
|                        | Safe blood transfusion                                                                                                                                                                                     |
|                        | Provision of delivery kits                                                                                                                                                                                 |

|                                                   |                                                                                                                                             |
|---------------------------------------------------|---------------------------------------------------------------------------------------------------------------------------------------------|
| Postpartum Care Services                          | Vitamin supplementation to mother                                                                                                           |
|                                                   | Information, education, and communication (IEC)                                                                                             |
|                                                   | Treatment of anemia, puerperal infection                                                                                                    |
|                                                   | Breast examination                                                                                                                          |
|                                                   | Case definition and referral of infertility cases to provincial hospital                                                                    |
|                                                   | Counselling sessions on exclusive breast feeding and birth spacing                                                                          |
| Family Planning Services                          | Counselling sessions and clinical examination                                                                                               |
|                                                   | Distribution of condoms and oral contraceptives                                                                                             |
|                                                   | Screening and treatment of sexually transmitted disease                                                                                     |
| Care of the Newborn                               | Kangaroo care                                                                                                                               |
|                                                   | Information, education, and communication (IEC)                                                                                             |
|                                                   | Stimulate, clean airway; clean, clamp, and cut cord; establish early breastfeeding                                                          |
|                                                   | Newborn resuscitation                                                                                                                       |
|                                                   | Newborn immunization                                                                                                                        |
|                                                   | Counselling, management and referral of neonatal sepsis, jaundice and tetanus                                                               |
| EPI Services                                      | Outreach immunization services                                                                                                              |
|                                                   | Vitamin A supplementation                                                                                                                   |
|                                                   | Information, education, and communication (IEC)                                                                                             |
|                                                   | Vaccine storage                                                                                                                             |
|                                                   | Disease surveillance and case reporting                                                                                                     |
| Integrated Management of Childhood Illness (IMCI) | Case Management of ARI and diarrhea                                                                                                         |
|                                                   | Ear problems                                                                                                                                |
|                                                   | Fever and Malaria                                                                                                                           |
|                                                   | Measles                                                                                                                                     |
|                                                   | Malnutrition and anemia                                                                                                                     |
|                                                   | Immunization                                                                                                                                |
| Public Nutrition Services                         | Prevention of Malnutrition:                                                                                                                 |
|                                                   | Vitamin A supplementation for children 6 to 59 months                                                                                       |
|                                                   | Promotion of iodized salt and balanced micronutrient rich foods                                                                             |
|                                                   | Promotion of exclusive breast feeding and maternal nutritional status                                                                       |
|                                                   | Promotion of appropriate complementary feeding                                                                                              |
|                                                   | Community food demonstration                                                                                                                |
|                                                   | Iron/folic acid supplementation for pregnant, lactating women                                                                               |
|                                                   | Vitamin A supplementation of post-partum women                                                                                              |
|                                                   | Prevention and control of diarrheal disease and parasitic infections                                                                        |
|                                                   | Treatment of Malnutrition:                                                                                                                  |
|                                                   | Diagnosis and treatment of micronutrient deficiency                                                                                         |
|                                                   | Community mobilization and screening: Treatment of severe malnutrition at community-based Community Therapeutic Centers (CTCs) <sup>5</sup> |
|                                                   | Out patient management (OPM)                                                                                                                |
|                                                   | Surveillance and Referral:                                                                                                                  |
|                                                   | Source: BPHS 2010 <sup>3</sup>                                                                                                              |

## Section 4. Governance and coordination mechanisms

Various mechanisms were introduced to support better coordination and engagement between stakeholders at different levels of decision-making and implementation. These included coordination mechanisms at national level (High Level Inter-Ministerial Committee for Inter-Sectoral Coordination for Health), MoPH level (Strategic Health Coordination Committee, Management and Technical Advisory Group), provincial level (Provincial Health Coordination Committee) and community level (Community Shura). To strengthen coordination, the Ministry of Finance introduced sectoral coordination mechanisms called Consultative Groups for each national program under the National Development Framework and emphasized the importance of Afghan government ownership on Consultative Groups as key for development and progress. The General Directorate of Policy and Planning at MoPH is responsible for laws, regulations and policies and aids implementation and enforcement <sup>4</sup> as well as ensuring that the priorities of the MoPH are reflected in the policy formulation.<sup>5</sup>

### Section 5. Community-based approaches in BPHS

There are various levels of facility which cater to the need of the population including the health post, basic health center (BHC), comprehensive health center (CHC) and district hospital (table S4). At village and community level, care is provided by community health workers at health posts; at district level through BHC and CHCs and secondary and tertiary care at provincial level by district, provincial and regional hospitals. In 2010, health sub centers and mobile health teams were also added.

Table S4: Community based approaches

| Components               | Details                                                                                                                                                                                                                                                                                                                                                                                                                                                                                                            |
|--------------------------|--------------------------------------------------------------------------------------------------------------------------------------------------------------------------------------------------------------------------------------------------------------------------------------------------------------------------------------------------------------------------------------------------------------------------------------------------------------------------------------------------------------------|
| Health facilities        | <ul style="list-style-type: none"> <li>- Provides midwifery, case management and preventive services</li> <li>- Provide outreach services to communities (E.g. expanded program of immunization-herd immunity)</li> <li>- Facility staff should coordinate with community leaders to optimize services in community</li> </ul>                                                                                                                                                                                     |
| Facility Shura           | <ul style="list-style-type: none"> <li>- Works with facility staff to ensure community needs and patient satisfaction</li> </ul>                                                                                                                                                                                                                                                                                                                                                                                   |
| Community Health Workers | <ul style="list-style-type: none"> <li>- Community volunteers</li> <li>- Serves a population of 100-150 families</li> <li>- Staffing of one male and female community health workers at health post</li> <li>- 40% females at a health post is necessary</li> <li>- Community health workers are trained to provide primary healthcare services and refer sick patients</li> <li>- Promote healthy lifestyle and behavior in communities</li> <li>- Maintain records and provide monthly report at HMIS</li> </ul> |
| Community Shura-e-sehie  | <ul style="list-style-type: none"> <li>- Provides support and leadership to health-related activities in community</li> <li>- Support, select and supervise community health workers</li> </ul>                                                                                                                                                                                                                                                                                                                    |

|                              |                                                                                                                                                                                                                                                                                                                                                                                                                                                                                                                                                                                   |
|------------------------------|-----------------------------------------------------------------------------------------------------------------------------------------------------------------------------------------------------------------------------------------------------------------------------------------------------------------------------------------------------------------------------------------------------------------------------------------------------------------------------------------------------------------------------------------------------------------------------------|
|                              | <ul style="list-style-type: none"> <li>- Monitor community map with community health workers to reach out to families in communities and provide preventive care</li> <li>- Provide leadership in promotion of social norms and behavior</li> </ul>                                                                                                                                                                                                                                                                                                                               |
| Community Health Supervisors | <ul style="list-style-type: none"> <li>- Supervise community health workers</li> <li>- Link between community and facility</li> <li>- Collect monthly reports</li> <li>- Regularly meet with Shuras' and manage community-based activities</li> </ul>                                                                                                                                                                                                                                                                                                                             |
| Family Health Action Groups  | <ul style="list-style-type: none"> <li>- Support group for community health workers</li> <li>- Improve health literacy, health seeking behavior and life style of mothers and children</li> <li>- Aimed to reduce maternal mortality</li> <li>- Selection criteria: mothers with &lt;5 years children, respected and reliable in the community, preferably literate (not required)</li> <li>- Consists of 10-15 members at the HP level and each member serves 10-15 households</li> <li>- Selected by community health workers with consultation from Community Shura</li> </ul> |

## Section 6. National health priority indicators

National priority health indicators are as follows (table S5).

Table S5: National health priority indicators

| Indicators                    |                                                                                      |
|-------------------------------|--------------------------------------------------------------------------------------|
| Mortality                     | Infant Mortality Rate                                                                |
|                               | Under-5 mortality rate                                                               |
|                               | Maternal Mortality Rate                                                              |
| Coverage                      | DPT3 coverage                                                                        |
|                               | Measles coverage                                                                     |
|                               | Antenatal coverage                                                                   |
|                               | Utilization of safety bed nets                                                       |
| Prevalence                    | HIV/AIDS                                                                             |
|                               | Malaria                                                                              |
|                               | Tuberculosis                                                                         |
|                               | Tuberculosis cases detected and cured under directly observed treatment short-course |
|                               | Contraceptive Prevalence Rate                                                        |
| Reproductive Health           | Skilled birth attendance                                                             |
|                               | Condom use rate of the contraceptive prevalence rate                                 |
|                               | Condom use at last high-risk sex                                                     |
|                               | Acute malnutrition for children under 5 years old                                    |
| Service Delivery              | Access to primary care services                                                      |
|                               | Availability of mental health services                                               |
|                               | Availability of disability services                                                  |
| Other                         | Contacts with health system                                                          |
|                               | Management of external funds by MoPH                                                 |
|                               | Median score on Balanced Scorecard                                                   |
|                               | Blood screening                                                                      |
|                               | Comprehensive correct knowledge of HIV/AIDS                                          |
| Source: MoPH Afghanistan 2007 |                                                                                      |

## Section 7. Funding mechanisms

Funding mechanisms evolved over time. The World Bank (WB) initially supported the health sector by providing funding through the International Development Association and the Afghan Reconstruction Trust Fund, although later funded the BPHS through the Health Sector Emergency Reconstruction and Development Project (HSERDP) and used performance based-partnership agreements, which provided lump sum, flexible funding. After the successful completion of HSERDP, WB and MoPH felt that the evidently underfunded health system of Afghanistan will continue to need donor support for sustainability of BPHS and reducing large out-of-pocket payments. New funding projects such as Strengthening Health Activities for the Rural Poor (SHARP) (from 2009 to 2013), System Enhancing for Health Actions in Transition (SEHAT) (from 2013 to 2018) and Sehatmandi (from 2018-2021). SEHAT had similar objectives to SHARP, however more attention was given to monitoring and evaluation and evidence-based decision making. Sehatmandi has similar objectives and inherited the framework of SEHAT. From April 2003 to December 2006, USAID provided financial support through the Rural Expansion of Afghanistan's Community-based Healthcare program (from 2003-2006), Performance-based Partnership Grants (PPG) (from 2006-2009), Partnership Contracts for Health (PCH) (from 2009-2015) and once PCH completed its objectives in June 2015, USAID decided to increase on-budget support by channeling its funds through ARTF to the SEHAT program. While EU channeled funds directly to the NGOs till 2013 and later it also joined the SEHAT program. The WB used Performance-based Partnership Agreements i.e., if an NGO reached or exceeded the specific targets, it would get a bonus worth up to 10% of initial lump-sum remuneration and offered fixed lump sum payment to the NGOs with 100% flexibility in budget. However, USAID and EU used input-based contracts which were less focused on performance-based assessments. After 2015, all the provinces were funded through a similar mechanism first through SEHAT and now Sehatmandi and all donors have agreed on the lump-sum payment method and one model for evaluation and monitoring.

Figure S1 shows the current health expenditure from 2002-2015 highlighting the uniform increase in the health expenditure over the years. Per capita expenditure on health care has increased over the years.

Fig S1: Health expenditure per capita in US\$



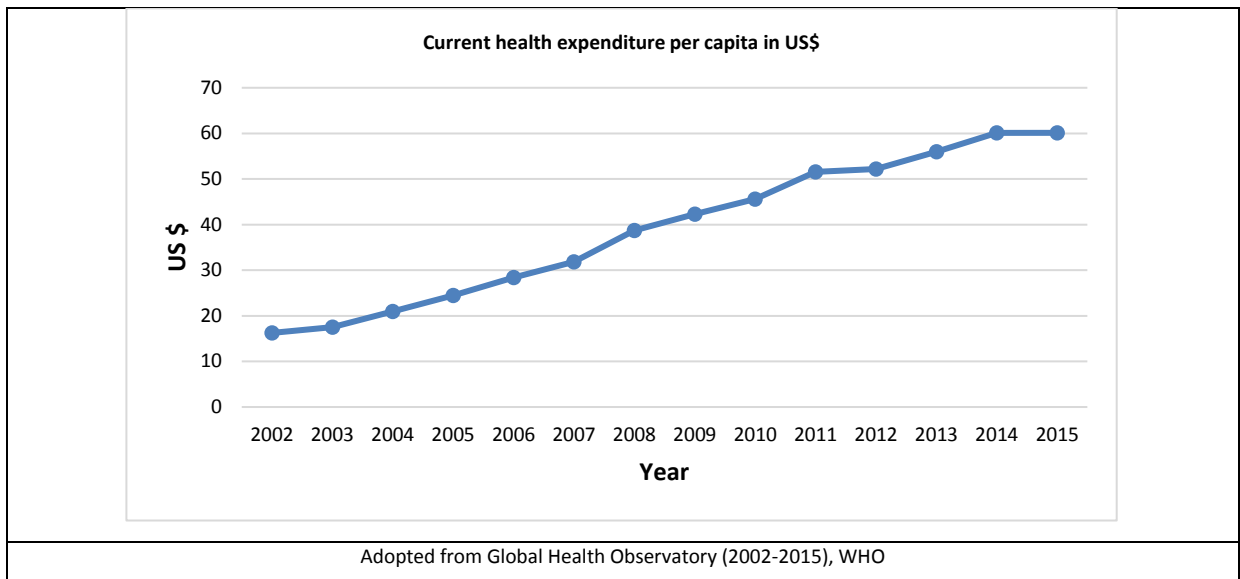

According to National Health Accounts, the major expenditure on health is still out-of-pocket comprising of around 74% of the total health expenditure, while the donors contribute 21.5% and government 5.5%. Figure S2 below shows the support of the three major donors over the years.

Fig S2: Contribution of major donors over years:

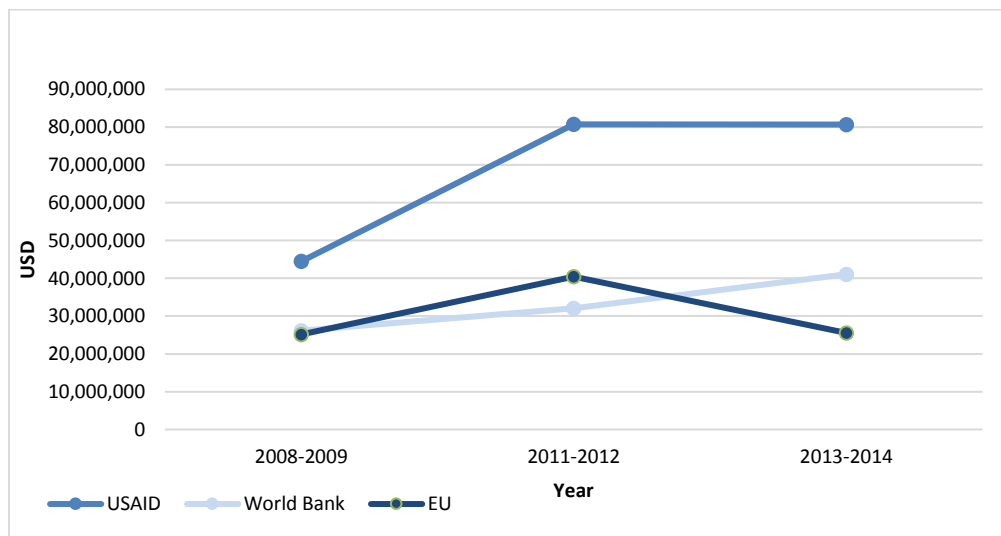

## Section 8. Innovations

These are some of the innovations tested

Table S6: Innovations

| Innovation                       | Intervention                                                                                                                                                                                                                                                                                                                        | Provinces                                                                                              | Target population                                                                                                                                     | Impact                                                                                                                                          |
|----------------------------------|-------------------------------------------------------------------------------------------------------------------------------------------------------------------------------------------------------------------------------------------------------------------------------------------------------------------------------------|--------------------------------------------------------------------------------------------------------|-------------------------------------------------------------------------------------------------------------------------------------------------------|-------------------------------------------------------------------------------------------------------------------------------------------------|
| <b>Conditional cash transfer</b> | Routine immunization and institutional deliveries.<br>Women were given 1000 Afs for delivering at a government healthcare facility and community health workers received 300 Afs/woman for coming to the health facility for an institutional delivery at a government healthcare facility                                          | Bamyan, Bagdhis and Kandahar                                                                           | To community health workers: to increase referrals for institutional delivery<br>To women (post-partum) when she gives birth at a government facility | Increase demand for healthcare services                                                                                                         |
| <b>Result based financing</b>    | Performance payments were made to health workers based on improvement in the provision of the maternal and child health services based on data reported in the Health Management Information System                                                                                                                                 | Balkh, Bamiyan, Daykundi, Jawzjan, Kandahar, Kunduz, Panjsher, Parwan, Samangan, Sar-e-Pul, and Takhar | Health workers                                                                                                                                        | Reduce maternal and child mortality                                                                                                             |
| <b>E-Health</b>                  | Telemedicine                                                                                                                                                                                                                                                                                                                        | N/a                                                                                                    | N/a                                                                                                                                                   | Improve healthcare delivery all over Afghanistan, including the remote areas                                                                    |
| <b>Maternity waiting houses</b>  | Residential facilities which provide Comprehensive Essential Maternal and Obstetric Care for women who are waiting to deliver and recover post-partum in a comfortable environment.                                                                                                                                                 | Badakhshan, Bamyan, Kunar, Hirat, Laghman and Kandahar                                                 | Pregnant women                                                                                                                                        | Provide safe delivery to women by a skilled birth attendant and improve health, hygiene and nutritional knowledge of women and their households |
| <b>Family health houses</b>      | Include Family health houses, as a lower level health facility than the basic health center, with mobile health teams so that health services could reach remote areas. It has four components which includes Family health house/ Ashiana-e-Sehi, health post, family health action group and community health shura/ shura-e-sehi | Herat, Bamyan, Farah and Daikundi                                                                      | Women                                                                                                                                                 | Increased access to reproductive, maternal, neonatal and child healthservices in under-served areas, hence decreasing morbidity and deaths      |
| <b>Mobile support team</b>       | Part of Family health house. Provides technical and managerial support to Family health houses from time to time and provides immunization and basic health services in remote villages surrounding the Family health                                                                                                               | Herat, Bamyan, Farah and Daikundi                                                                      | Women                                                                                                                                                 | Effective reproductive, maternal, neonatal and child health services to the underserved areas                                                   |

|                                   |                                                                                                                                                                |     |       |                                                                          |
|-----------------------------------|----------------------------------------------------------------------------------------------------------------------------------------------------------------|-----|-------|--------------------------------------------------------------------------|
|                                   | houses.                                                                                                                                                        |     |       |                                                                          |
| <b>Family health action group</b> | These support groups help spread health messages and awareness amongst the community, hence leading to better usage of health services that are being provided | N/a | Women | Improved family's attitude towards health with efficient health services |

## Section 9. Strengths, weaknesses, opportunities and threats analysis

| Strengths                                                                                                                                                                                                                                                                                                                                                                                                                                                                                                                                                                                                                                                                                                                                                    | Weakness                                                                                                                                                                                                                                                                                                                                                                                                                                                                                                                                                                                                                                                                                                                                                                                                                                                                                                                                                                                                    |
|--------------------------------------------------------------------------------------------------------------------------------------------------------------------------------------------------------------------------------------------------------------------------------------------------------------------------------------------------------------------------------------------------------------------------------------------------------------------------------------------------------------------------------------------------------------------------------------------------------------------------------------------------------------------------------------------------------------------------------------------------------------|-------------------------------------------------------------------------------------------------------------------------------------------------------------------------------------------------------------------------------------------------------------------------------------------------------------------------------------------------------------------------------------------------------------------------------------------------------------------------------------------------------------------------------------------------------------------------------------------------------------------------------------------------------------------------------------------------------------------------------------------------------------------------------------------------------------------------------------------------------------------------------------------------------------------------------------------------------------------------------------------------------------|
| <ul style="list-style-type: none"> <li>● Six types of primary healthcare facilities and community outreach approaches to increase access and improve equity</li> <li>● Multistakeholder collaborative model allowed relative strengths and expertise of partners to be maximized</li> <li>● Clearly defined role of stakeholders</li> <li>● Community midwifery and community nursing program improved delivery of services</li> <li>● Competitive and transparent mechanism of awarding contracts</li> <li>● Technical and regulatory bodies ensure quality and accountability</li> <li>● Improved equity of care</li> <li>● Flexibility and adaptability</li> <li>● Monitoring and evaluation system in place including third party evaluations</li> </ul> | <ul style="list-style-type: none"> <li>● Unavailability of female health professionals (especially female doctors) in underprivileged areas</li> <li>● No focus on non-communicable diseases or trauma care</li> <li>● Gaps in data collection from various sources</li> <li>● Economic evaluation (cost benefit and cost-effective analysis) of BPHS not conducted</li> <li>● Contracting mechanism is based on least cost</li> <li>● Insufficient and inadequately trained staff, especially in highly-insecure areas</li> <li>● Unreliable drug quality control</li> <li>● Lack of capacity building of hospital administrators and managers</li> <li>● Corruption within healthcare</li> <li>● Scant sharing of information between ministerial departments</li> <li>● Minimal efforts on problem solving (equipping teams with quality/problem solving tools for improvement)</li> <li>● Staff turn-over due to lack of facilities</li> <li>● Inequitable distribution of health facilities</li> </ul> |
| Opportunities                                                                                                                                                                                                                                                                                                                                                                                                                                                                                                                                                                                                                                                                                                                                                | Threats                                                                                                                                                                                                                                                                                                                                                                                                                                                                                                                                                                                                                                                                                                                                                                                                                                                                                                                                                                                                     |
| <ul style="list-style-type: none"> <li>● Availability of donor funds</li> <li>● Availability of human resources in the market</li> <li>● Potential for increased fundraising opportunities within the system eg introducing user fees</li> <li>● Switch the contracts from least cost to standard cost.</li> </ul>                                                                                                                                                                                                                                                                                                                                                                                                                                           | <ul style="list-style-type: none"> <li>● Political instability and insecurity affects overall implementation and results</li> <li>● Donor dependency</li> <li>● Sustainability of healthcare services</li> <li>● Cultural barriers</li> </ul>                                                                                                                                                                                                                                                                                                                                                                                                                                                                                                                                                                                                                                                                                                                                                               |

|                                                                                                                                                                                                                                                                                                                                                                                                                                                                                                         |  |
|---------------------------------------------------------------------------------------------------------------------------------------------------------------------------------------------------------------------------------------------------------------------------------------------------------------------------------------------------------------------------------------------------------------------------------------------------------------------------------------------------------|--|
| <ul style="list-style-type: none"> <li>● Access to quality international and national experts as well as a high level of commitment and knowledge from Afghanistan’s health sector leadership</li> <li>● Revisions of BPHS and policies and strategies based on findings from the various evaluation mechanisms</li> <li>● Prioritization of health education for women leaving in rural areas</li> <li>● Increase in number of female community health workers and midwives in remote areas</li> </ul> |  |
|---------------------------------------------------------------------------------------------------------------------------------------------------------------------------------------------------------------------------------------------------------------------------------------------------------------------------------------------------------------------------------------------------------------------------------------------------------------------------------------------------------|--|

## References

1. Afghanistan Health Indicators, Fact Sheet Ministry of Public Health, Afghanistan. 2014. [Available from: <http://moph.gov.af/Content/Media/Documents/AfghanistanHealthIndicatorsFactsheetFeb2014612201410261651553325325.pdf>.
2. National Reconstruction and Poverty Reduction — the Role of Women in Afghanistan’s Future World Bank. 2005 [Available from: <http://siteresources.worldbank.org/AFGHANISTANEXTN/Resources/AfghanistanGenderReport.pdf>.
3. Government of Afghanistan, Ministry of Health. A Basic Package of Health Services for Afghanistan – 2010/1389. 2010 [Available from: [http://saluteinternazionale.info/wp-content/uploads/2011/01/Basic\\_Pack\\_Afghan\\_2010.pdf](http://saluteinternazionale.info/wp-content/uploads/2011/01/Basic_Pack_Afghan_2010.pdf).
4. National Health Strategy 2016–2020; Sustaining Progress and Building for Tomorrow and Beyond Ministry of Public Health, Afghanistan. 2016. [83]. Available from: [http://moph.gov.af/Content/Media/Documents/MoPHStrategy2016-2020\\_Final09September2016111201614508950553325325.pdf](http://moph.gov.af/Content/Media/Documents/MoPHStrategy2016-2020_Final09September2016111201614508950553325325.pdf).
5. National health Policy 2005-2009 Ministry of Public Health, Afghanistan. 2005. [58]. Available from: <https://extranet.who.int/nutrition/gina/sites/default/files/AFG%202005%20National%20Health%20Policy%20and%20National%20Health%20Strategy%20.pdf>.
